# Supplementary figures and images for: Polyorchidism in a young Sprague-Dawley rat
Source: PubMed Central journal article supplement — J Toxicol Pathol. 2024 Apr 9;37(3):127–31. doi: 10.1293/tox.2024-0005 (PMC11219188; doi:10.1293/tox.2024-0005), 2024-04-09

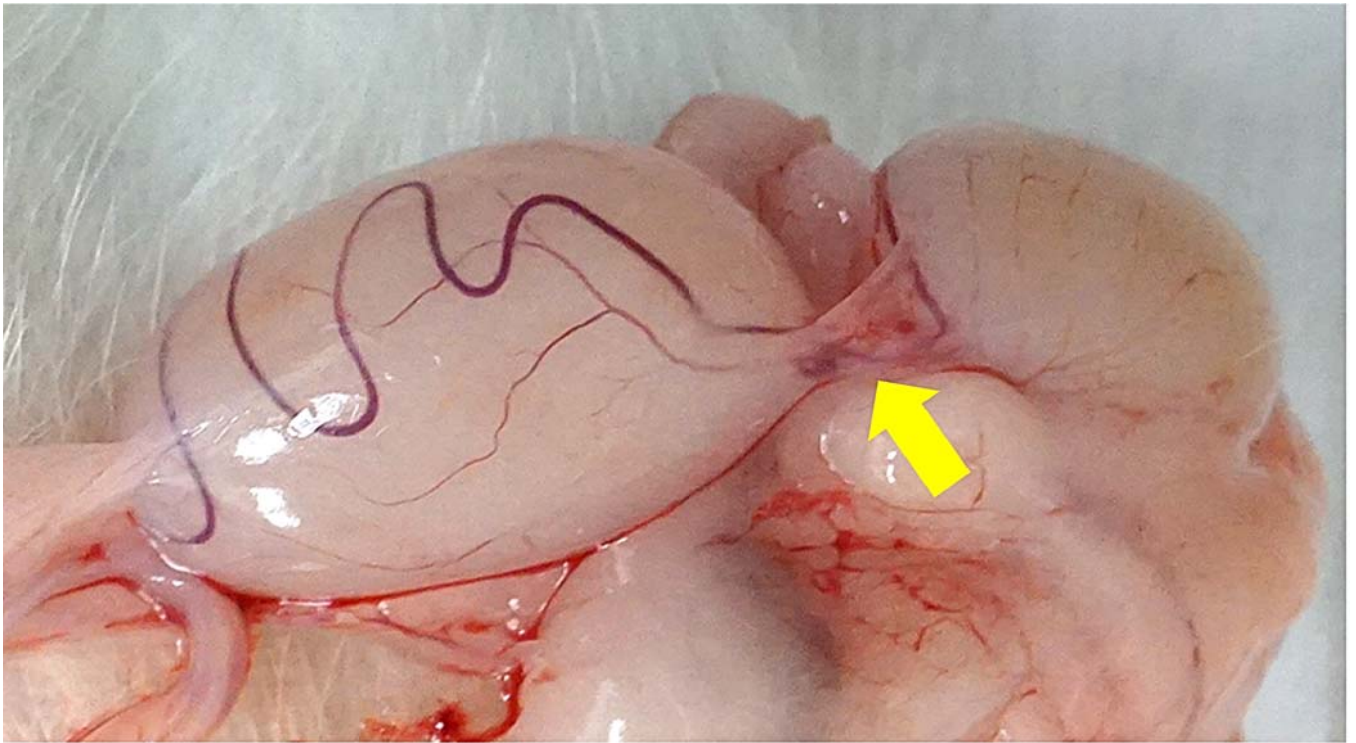

Supplement: tox-37-127-s001.pdf [file tox-37-127-s001.pdf]
